# Supplementary material for: Ligand removal energetics control CO2 electroreduction selectivity on atomically precise, ligated alloy nanoclusters
Source: Royal Society of Chemistry journal article supplement (doi:10.1039/d2en00157h), 2022-01-01
Supplement: d2en00157h1.pdf [file d2en00157h1.pdf]

## Ligand removal energetics control CO<sub>2</sub> electroreduction selectivity on atomically precise, ligated alloy nanoclusters

Malena Rybacki<sup>‡</sup>, Anantha Venkataraman Nagarajan<sup>‡</sup>, Giannis Mpourmpakis\*

Department of Chemical and Petroleum Engineering, University of Pittsburgh, Pittsburgh,  
Pennsylvania 15261, USA

\*Corresponding Author email: [gmpourmp@pitt.edu](mailto:gmpourmp@pitt.edu)

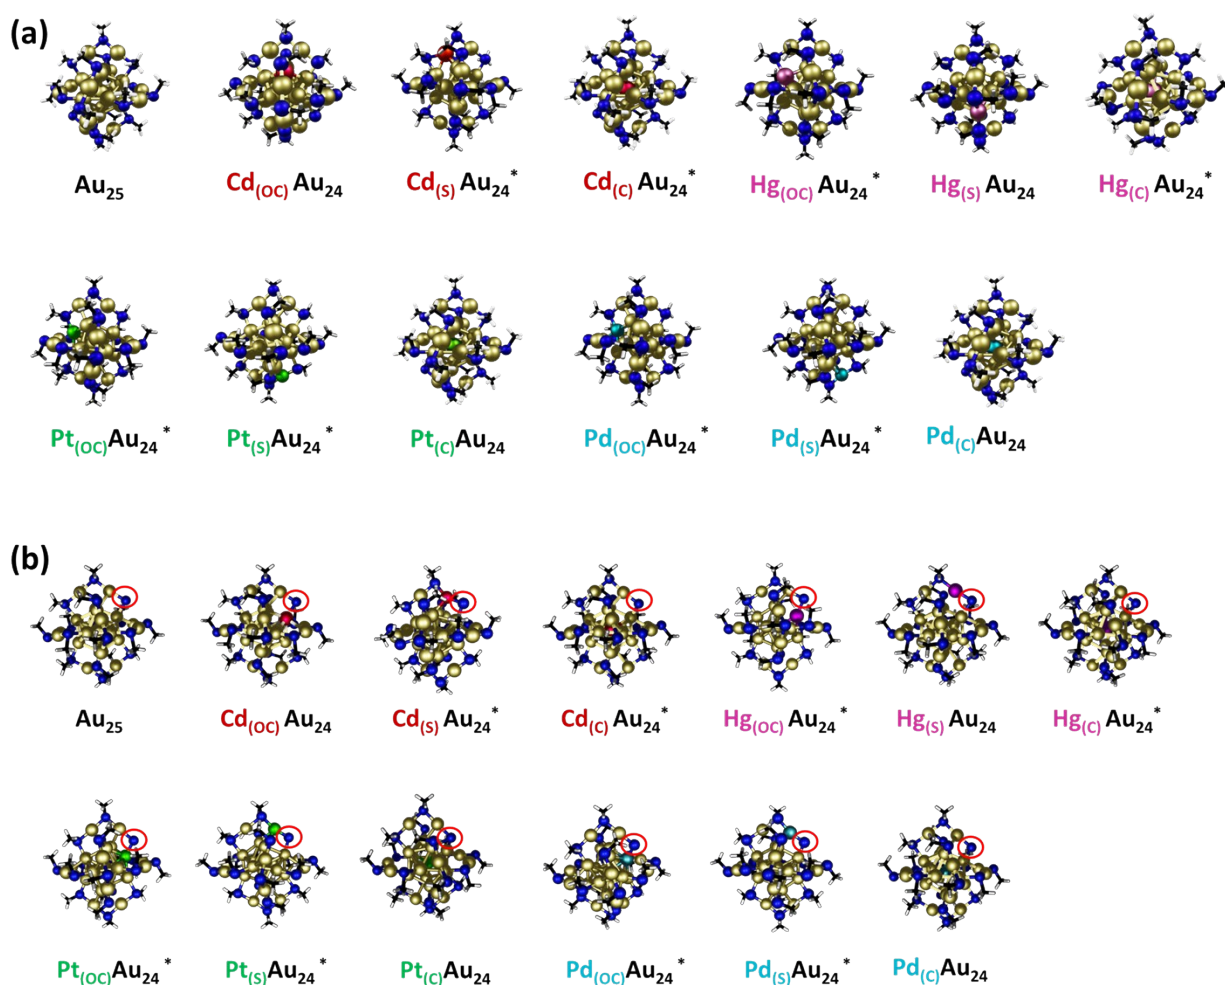

**Figure S1.** Structures of all optimized TPNCs in their (a) fully protected state and (b) upon -R removal. Dopants indicated by color.  $\text{Au}_{25}$  has the same optimized structure in the neutral state and the negatively charged state. Hypothetical systems are labeled with \*. Red circle indicates site of -R removal.

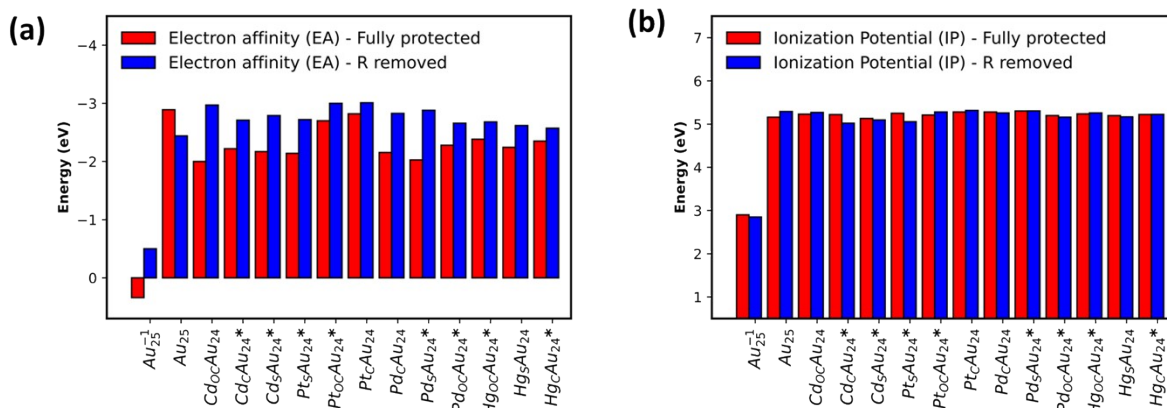

**Figure S2.** (a) EA and (b) IP of all TPNCs (including Au<sub>25</sub> in its negative (-1) charge state) in their fully protected state (red bars) and upon -R removal (blue bars). Hypothetical systems are labeled with \*.

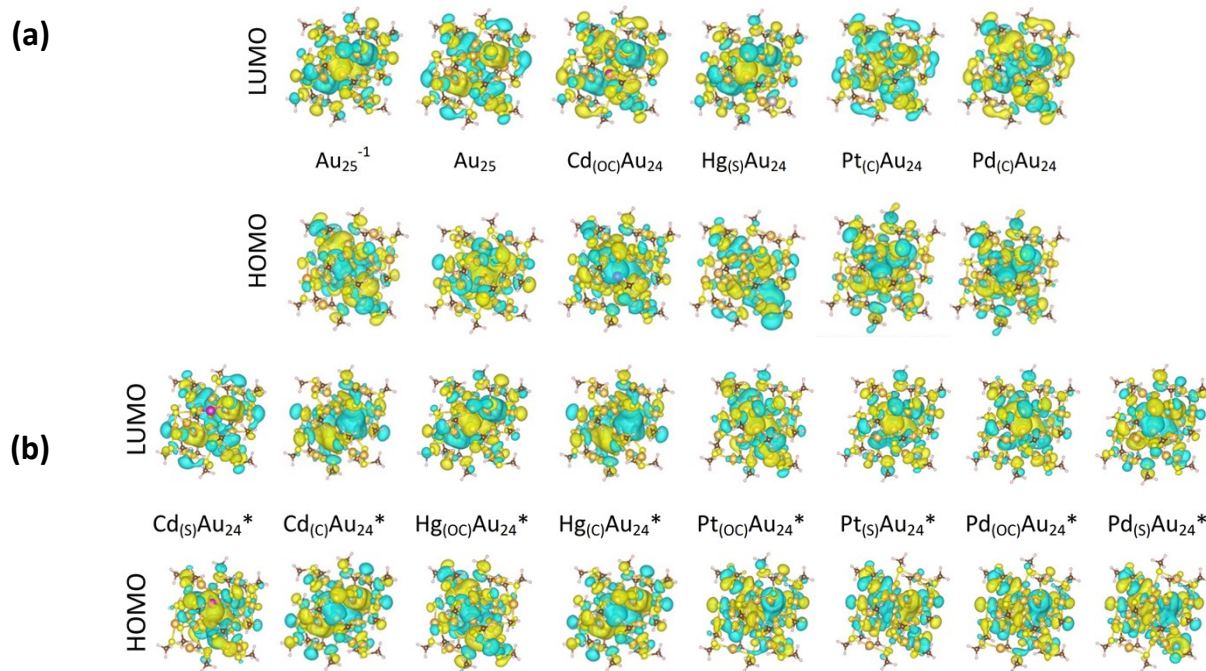

**Figure S3.** HOMO and LUMO of (a) experimentally determined TPNCs and (b) hypothetical TPNCs in their fully protected state. Hypothetical systems are labeled with \*.

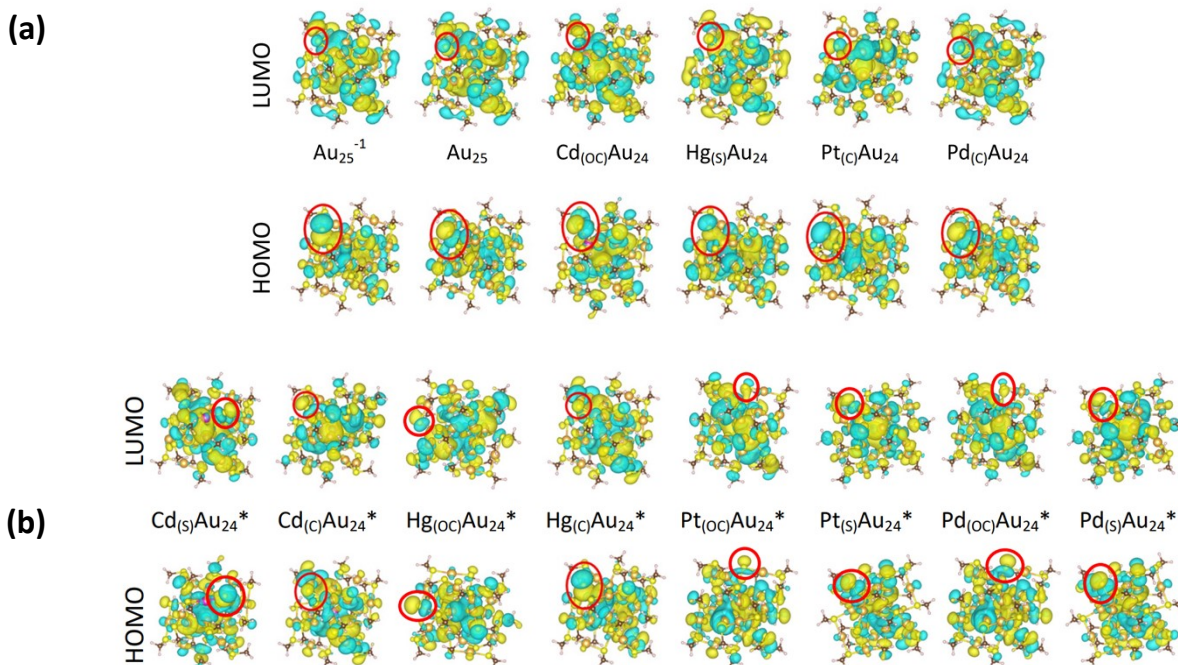

**Figure S4.** HOMO and LUMO of (a) experimentally determined TPNCs and (b) hypothetical TPNCs upon -R removal. Hypothetical systems are labeled with \*.

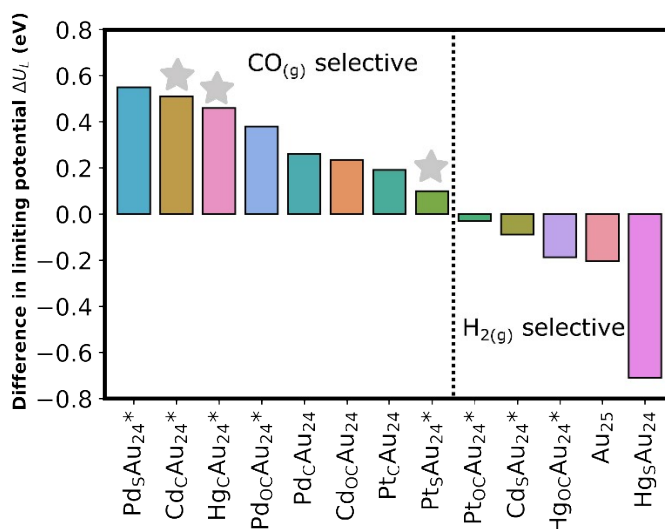

**Figure S5.** Difference in limiting potentials ( $\Delta U_L$ ) of CO<sub>2</sub>R vs. HER on the S active sites of the different TPNCs. Positive values reflect selectivity towards CO<sub>(g)</sub> formation while negative values reflect selectivity towards H<sub>2(g)</sub> formation. Dashed line separates TPNCs selective towards CO<sub>(g)</sub> (left) or H<sub>2(g)</sub> formation (right). \*CO formation is the limiting potential on TPNCs with a grey star.

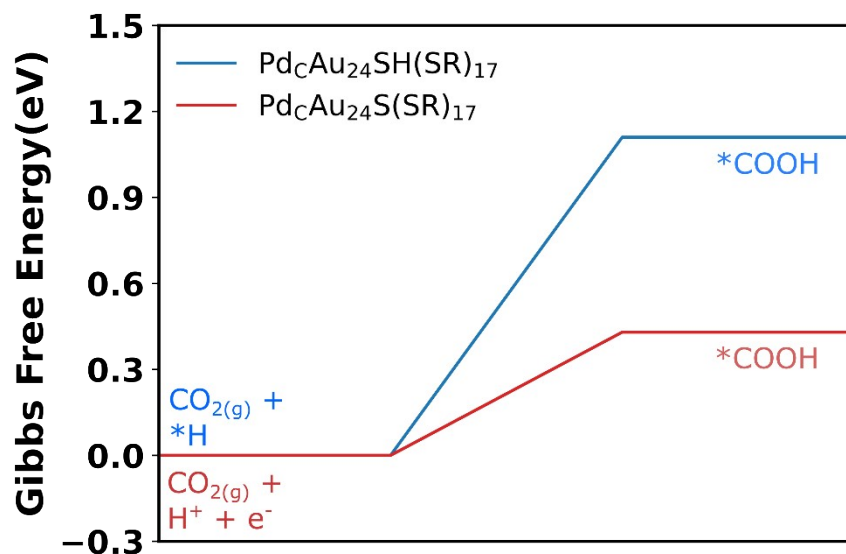

**Figure S6.** \*COOH formation energy on S active sites of Pd<sub>(C)</sub>Au<sub>24</sub> when it is formed via \*H bound on the S site (blue line) or via proton coupled electron transfer (H<sup>+</sup> + e<sup>-</sup>, red line)

| TPNC                                  | Bader charge of S active site in fully protected TPNC | Bader charge of S active site in - R removed TPNC |
|---------------------------------------|-------------------------------------------------------|---------------------------------------------------|
| Au <sub>25</sub>                      | -0.05                                                 | -0.30                                             |
| Cd <sub>(OC)</sub> Au <sub>24</sub>   | -0.07                                                 | -0.51                                             |
| Cd <sub>(S)</sub> Au <sub>24</sub> *  | -0.22                                                 | -0.53                                             |
| Cd <sub>(C)</sub> Au <sub>24</sub> *  | -0.07                                                 | -0.30                                             |
| Hg <sub>(OC)</sub> Au <sub>24</sub> * | -0.09                                                 | -0.41                                             |
| Hg <sub>(S)</sub> Au <sub>24</sub>    | -0.07                                                 | -0.36                                             |
| Hg <sub>(C)</sub> Au <sub>24</sub> *  | -0.07                                                 | -0.30                                             |
| Pt <sub>(OC)</sub> Au <sub>24</sub> * | -0.03                                                 | -0.25                                             |
| Pt <sub>(S)</sub> Au <sub>24</sub> *  | -0.05                                                 | -0.22                                             |
| Pt <sub>(C)</sub> Au <sub>24</sub>    | -0.04                                                 | -0.28                                             |
| Pd <sub>(OC)</sub> Au <sub>24</sub> * | -0.10                                                 | -0.30                                             |
| Pd <sub>(S)</sub> Au <sub>24</sub> *  | -0.08                                                 | -0.27                                             |
| Pd <sub>(C)</sub> Au <sub>24</sub>    | -0.03                                                 | -0.25                                             |

**Table S1.** Bader charge comparison of fractional charge on S active site on the fully protected TPNC vs -R removed TPNC. More negative number implies higher electron density on the S active site.

| TPNC                                 | *CO formation (eV) | Difference in limiting potentials ( $\Delta U_L$ , eV) |
|--------------------------------------|--------------------|--------------------------------------------------------|
| Hg <sub>(C)</sub> Au <sub>24</sub> * | 0.36               | 0.46                                                   |
| Cd <sub>(C)</sub> Au <sub>24</sub> * | 0.28               | 0.51                                                   |
| Pt <sub>(S)</sub> Au <sub>24</sub> * | 0.19               | 0.10                                                   |

**Table S2.** \*CO formation energies along with difference in limiting potentials ( $\Delta U_L$ ) for TPNCs with \*CO formation as the limiting potential. In the above three cases,  $\Delta U_L = G$  (\*CO formation) –  $G$  (\*H formation). In all other cases,  $\Delta U_L = G$  (\*COOH formation) –  $G$  (\*H formation)
